# Supplementary material for: Brain Organoids to Evaluate Cellular Therapies
Source: MDPI journal article supplement (doi:10.3390/ani12223150), 2022-11-15
Supplement: s1 [file s1]

**Fig. S1 (to Fig.1). TOP**

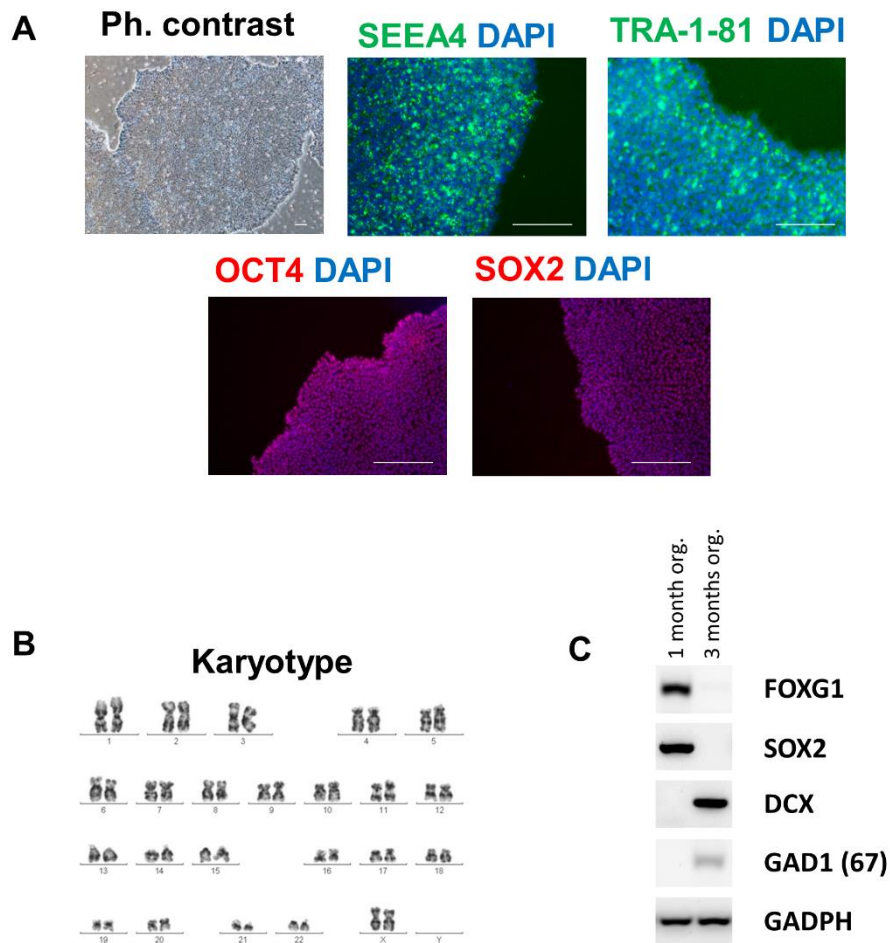

**Figure S1: iPSC and organoid quality controls.** A) Phase contrast image of iPSC colonies and expression of the pluripotency markers SEEA4, TRA-1-81, OCT4 and SOX2 prior organoid generation. Scale bar: 100  $\mu$ m. B) iPSC used for organoid generation showed normal karyotype. C) Analysis of different markers expressed during human brain development at different time points of organoid culture.

**Table S1.** List of antibodies used.

| Primary antibodies                                        | Dilution | Company (Cat)                                            |
|-----------------------------------------------------------|----------|----------------------------------------------------------|
| Olig2                                                     | 1:500    | R&D System, Minneapolis, Minnesota, USA (AF2418)         |
| Tuj1 ( $\beta$ -III Tubulin)                              | 1:1000   | Covance, Princeton, New Jersey, USA (MMS-43SP)           |
| MAP2                                                      | 1:100    | Santa Cruz Biotechnology, Dallas, USA (sc-32791)         |
| SATB2                                                     | 1:100    | Abcam, Cambridge, UK (ab34735)                           |
| CTIP2                                                     | 1:100    | Abcam, Cambridge, UK (ab18465)                           |
| TUB $\beta$ IV ( $\beta$ -IV Tubulin)                     | 1:100    | Sigma, San Luis, Misuri, USA (T7941)                     |
| FOXJ1                                                     | 1:500    | Abcam, Cambridge, UK (ab18259)                           |
| TTR (Transthyretin)                                       | 1:200    | Agilent Technologies, Santa Clara, CA, USA (A0002)       |
| GFP Rabbit                                                | 1:200    | Invitrogen, Waltham, Massachusetts, USA (A11122)         |
| GFP Chicken                                               | 1:200    | Abcam, Cambridge, UK (ab13970)                           |
| Ki67                                                      | 1:100    | Dako by Agilent Tech, Santa Clara, CA, USA (M7240)       |
| Nestin                                                    | 1:1000   | Abcam, Cambridge, UK (ab22035)                           |
| DCX (Doublecortin)                                        | 1:1000   | Millipore, Burlington, Massachusetts, USA (AB2253)       |
| GFAP Rabbit                                               | 1:500    | Millipore, Burlington, Massachusetts, USA (AB5804)       |
| GFAP Chicken                                              | 1:1000   | Abcam, Cambridge, UK (ab4674)                            |
| HNA (Human Nuclei)                                        | 1:200    | Abcam, Cambridge, UK (ab191181)                          |
| IBA1                                                      | 1:200    | Abcam, Cambridge, UK (ab5076)                            |
| Ku80                                                      | 1:100    | Cell Signaling Tech, Danvers, Massachusetts, USA (#2753) |
| hGFAP (human GFAP)                                        | 1:500    | Takara Bio, Shiga, Japan (Y40420)                        |
| SSEA4                                                     | 1:100    | Cell Signaling Tech, Danvers, Massachusetts, USA (MC813) |
| Tra-1-81                                                  | 1:100    | Millipore, Burlington, Massachusetts, USA (MAB4381)      |
| OCT4                                                      | 1:400    | Cell Signaling Tech, Danvers, Massachusetts, USA (C30A3) |
| SOX2                                                      | 1:500    | Millipore, Burlington, Massachusetts, USA (AB5603)       |
| NKX2.1                                                    | 1:100    | R&D System, Minneapolis, Minnesota, USA (MAB94581)       |
| Secondary antibodies                                      | Dilution | Company (Cat)                                            |
| Donkey anti-Rabbit IgG (H+L) (Alexa Fluor 488, Green)     | 1:500    | Invitrogen, Waltham, Massachusetts, USA (A21206)         |
| Donkey anti-Mouse IgG (H+L) (Alexa Fluor 488, Green)      | 1:500    | Invitrogen, Waltham, Massachusetts, USA (A21202)         |
| Donkey anti-Guinea pig IgG (H+L) (Alexa Fluor 488, Green) | 1:400    | Jackson ImmunoR, Cambridge, UK (706-454-148)             |
| Donkey anti-Rat IgG (H+L) (Alexa Fluor 488, Green)        | 1:500    | Invitrogen, Waltham, Massachusetts, USA (A48269)         |
| Donkey anti-Rabbit IgG (H+L) (Alexa Fluor 594, Red)       | 1:500    | Invitrogen, Waltham, Massachusetts, USA (A21207)         |
| Donkey anti-Goat IgG (H+L) (Alexa Fluor 594, Red)         | 1:500    | Invitrogen, Waltham, Massachusetts, USA (A11058)         |
| Donkey anti-Chicken IgG (H+L) (Alexa Fluor 594, Red)      | 1:400    | Jackson ImmunoR, Cambridge, UK (703-585-155)             |
